# Supplementary material for: A ubiquitin-like domain is required for stabilizing the N-terminal ATPase module of human SMCHD1
Source: PubMed Central journal article supplement (PMC6620310; doi:10.1038/s42003-019-0499-y), 2019-07-10
Supplement: 42003_2019_499_MOESM2_ESM.pdf [file 42003_2019_499_MOESM2_ESM.pdf]

## **Supplementary Data**

Individual data points plotted in the main and supplementary figures and exact p-values for all comparisons between wild-type and mutant constructs.
